# Supplementary figures and images for: Effects of Luteolin on Biofilm of Trueperella pyogenes and Its Therapeutic Effect on Rat Endometritis
Source: MDPI journal article supplement (doi:10.3390/ijms232214451), 2022-11-21

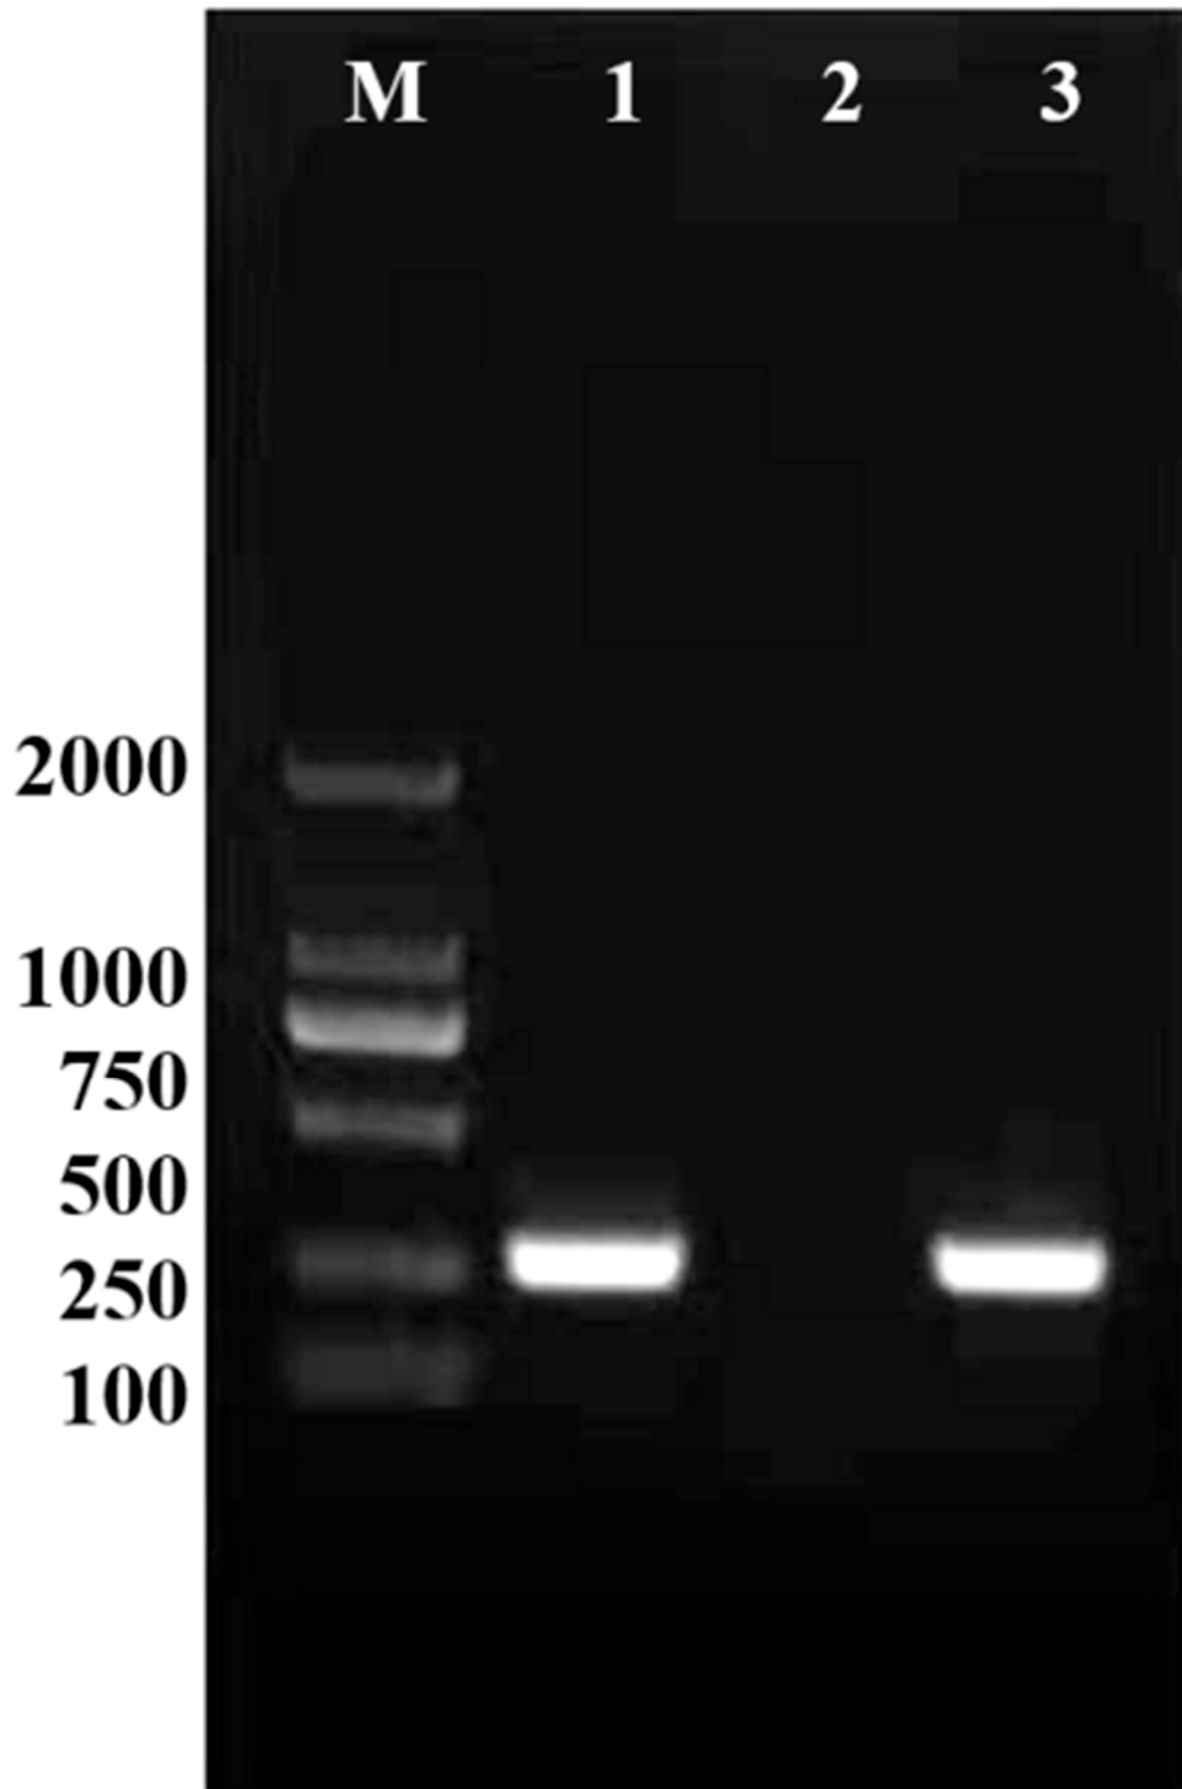

Figure S1: Screening of *plo* gene in rat intrauterine fluid of to identify *T. pyogenes* strains.

Supplement: s1 [file s1]
